# Supplementary material
Source: PubMed Central journal article supplement (PMC3706839)
Supplement: supp_me.2012-1353_Binder1.pdf [file supp_me.2012-1353_Binder1.pdf]

**Supplementary Figure 1.** FoxG1 induces apoptosis and down-regulates AIB1 protein expression in MDA-MB-231 breast cancer cells. A, MDA-MB-231 cells were transfected with either an empty vector (EV) control or FoxG1 constructs. 24 hours after transfection, cells were subjected to Annexin V apoptosis analysis and cells undergoing early apoptosis were quantified. The mean  $\pm$  SEM values were obtained from duplicate samples from each transfection condition. \*,  $P < 0.05$  relative to EV. Statistical analysis was done by Student's *t* test. B, Analysis of endogenous AIB1 protein expression in MDA-MB-231 cells overexpressing FoxG1. Cells were transfected with EV or FoxG1 as in (A), whole cell lysates were then collected to determine the relative protein levels for AIB by WB with antibodies as indicated.

**Supplementary Table 1.** The impact of FoxG1 expression on endogenous genes in MCF-7 breast cancer cells. MCF-7 cells were transfected with an EV control or FoxG1 expressing vectors. Total RNA was collected 24 hours post transfection. Quantitative real time PCR was performed to assess the mRNA expression of 168 genes that are known to participate in or respond to ER or NF- $\kappa$ B signaling (SABiosciences Array/Qiagen). All gene expressions were corrected for loading controls (5 housekeeping genes). The mean and 99% confidence interval were calculated for all 168 genes. A cutoff of gene expression changes of  $>1.5$  fold was used to assess up- or downregulation of gene expression. \*\*,  $P < 0.01$  relative to EV; ns = not significant.

Figure S1

A

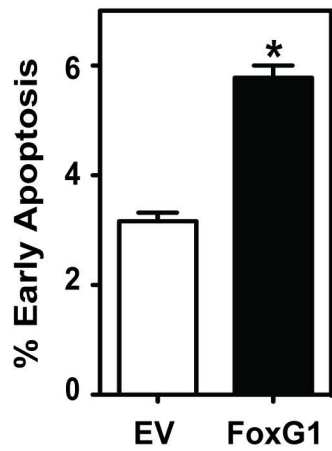

B

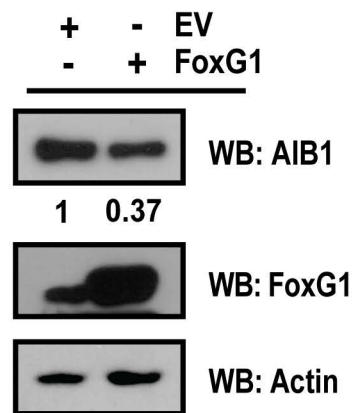

Supplemental Table 1

| <b>NF-κB Responsive</b> |                        |
|-------------------------|------------------------|
| <b>Gene</b>             | <b>Regulation</b>      |
| <b>(acronym)</b>        | <b>(fold, p-value)</b> |
| CCL2                    | + 18.3 **              |
| CCL5                    | + 5.3 **               |
| CSF1                    | + 2.1 **               |
| CSF2                    | + 1.7 **               |
| CSF3                    | - 12.1 **              |
| ICAM1                   | + 4.9 **               |
| IFNG                    | - 3.0 **               |
| IL8                     | + 1.1 ns               |
| LTA                     | + 1.1 ns               |
| TNF                     | + 4.0 **               |

| <b>ER Responsive</b> |                        |
|----------------------|------------------------|
| <b>Gene</b>          | <b>Regulation</b>      |
| <b>(acronym)</b>     | <b>(fold, p-value)</b> |
| AIB1                 | - 2.0 **               |
| BRCA1                | - 2.4 **               |
| EBAG9                | - 1.6 **               |
| ESR1                 | - 2.2 **               |
| HER2                 | - 1.6 **               |
| IRS1                 | - 2.1 **               |
| PGR                  | - 1.8 **               |
| PS2=TFFI             | - 1.9 **               |
| XB1                  | - 2.0 **               |
